# Supplementary material for: Isotopic and microbotanical insights into Iron Age agricultural reliance in the Central African rainforest
Source: PubMed Central journal article supplement (PMC7591565; doi:10.1038/s42003-020-01324-2), 2020-10-27
Supplement: 42003_2020_1324_MOESM3_ESM.pdf [file 42003_2020_1324_MOESM3_ESM.pdf]

## Description of Additional Supplementary Files

File Name: Supplementary Data 1

Description:

Sheet 1: Sample and standard EA-IRMs data (session 1). Samples with Amplitude m/z 44

Sheet 2: Sample and standard EA-IRMs data (session 2). Samples with Amplitude m/z 44

Sheet 3: Calibration of the results from Session 1 and Session 2.

Sheet 4: Uncertainty calculations for  $\delta^{13}\text{C}$ .

Sheet 5: Uncertainty calculations for  $\delta^{15}\text{N}$ .

Sheet 6: Uncertainty calculations for %C. Sheet 7: Uncertainty calculations for %N.

Sheet 7: Uncertainty calculations for %N
